# Supplementary material for: Locus coeruleus to basolateral amygdala noradrenergic projections promote anxiety-like behavior
Source: eLife journal article supplement (doi:10.7554/elife.18247), 2017-07-14
Supplement: supp [file elife_poa_e18247_Figure_4_source_data_1.xlsx]

## Sheet: Figure 4B
ChR2	Ctrl
27	9.33333
61.3333	16.3333
37.3333	11
37.6667	16.6667
30.3333
29.6667
31.6667
34

## Sheet: Figure 4C
vHPC	CeA	NAc
28.9474	23.5294	18.1818
39.5349	27.907	15.625
41.9355	41.6667	10.9756
28.125	25.7143	18.1818
31.8182	37.931	13.7931
43.2432	23.6842	25.9259
28		21.4286
28.2051		26.4706
16.129
