# Supplementary material for: Locus coeruleus to basolateral amygdala noradrenergic projections promote anxiety-like behavior
Source: eLife journal article supplement (doi:10.7554/elife.18247), 2017-07-14
Supplement: supp [file elife_poa_e18247_Figure_5_source_data_1.xlsx]

## Sheet: Figure 5G
eYFP	ChR2
-9.60958	-284.884
1.80181	-203.403
-38.2381	-280.48
24.6245	47.4473
26.8267	-213.813
-161.761	-65.0649
44.2441	-244.644
-159.159	33.0329
	-275.475
