# Supplementary material for: Locus coeruleus to basolateral amygdala noradrenergic projections promote anxiety-like behavior
Source: eLife journal article supplement (doi:10.7554/elife.18247), 2017-07-14
Supplement: supp [file elife_poa_e18247_Figure_6_source_data_1.xlsx]

## Sheet: Figure 6C
eYFP	ChR2
177.377	81.4815
237.638	109.51
175.576	194.394
187.321	197.397
244.832	162.963
334.434	158.792
164.731	11.2779
42.042	4.2042
291.458	30.3971
259.927	51.7184
	39.306

## Sheet: Figure 6D
eYFP	ChR2
15458	11800.6
18559.3	12835
15255.5	9347.69
10627.3	14290.2
8546.69	13310.3
8846.46	8984.58
7798.65	9916.62
8870.46	8635.95
11805.4	10767.2
10332.3	10449.1
	11730.9

## Sheet: Figure 6G
eYFP + Vehicle	ChR2 + Vehicle	eYFP + Propranolol	ChR2 + Propranolol
15.6841	16.7501	25.3615	23.8466
29.9221	17.8988	34.9277	12.0067
20.9005	11.6797	25.3474	35.6865
28.8098	14.2937	30.239	21.5795
19.436	6.18209	35.4242	34.8125
14.6072	18.1477	19.7975	25.303
14.4681	6.67332	36.7033	34.4788
43.2654	6.17282		38.2048
39.0389	4.00399
23.023
37.3706
