# Supplementary figures and images for: Locus coeruleus to basolateral amygdala noradrenergic projections promote anxiety-like behavior
Source: eLife journal article supplement (doi:10.7554/elife.18247), 2017-07-14

Figure 1 - supplement figure 1

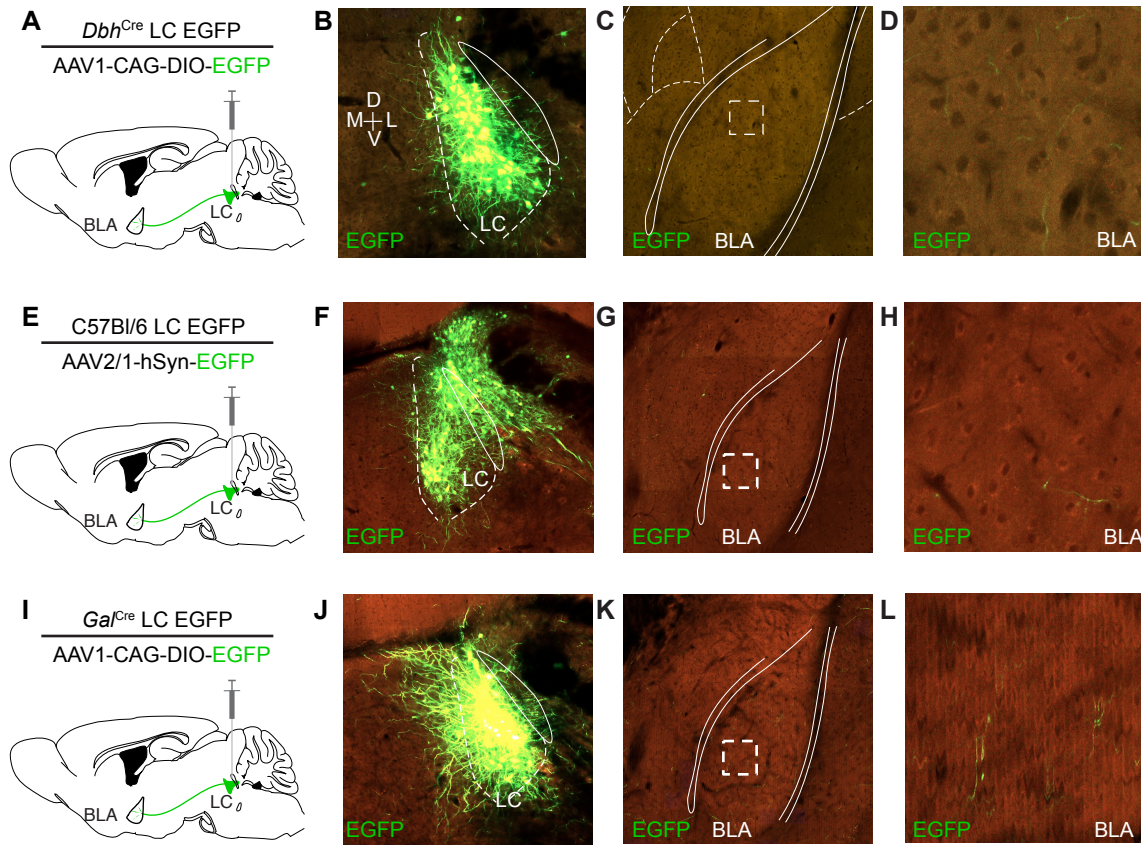

Supplement: supp [file elife_poa_e18247_Figure_1_figure_supplement_1.pdf › elife_poa_e18247_Figure_1_figure_supplement_1.pdf]

Figure 3 - supplement figure 1

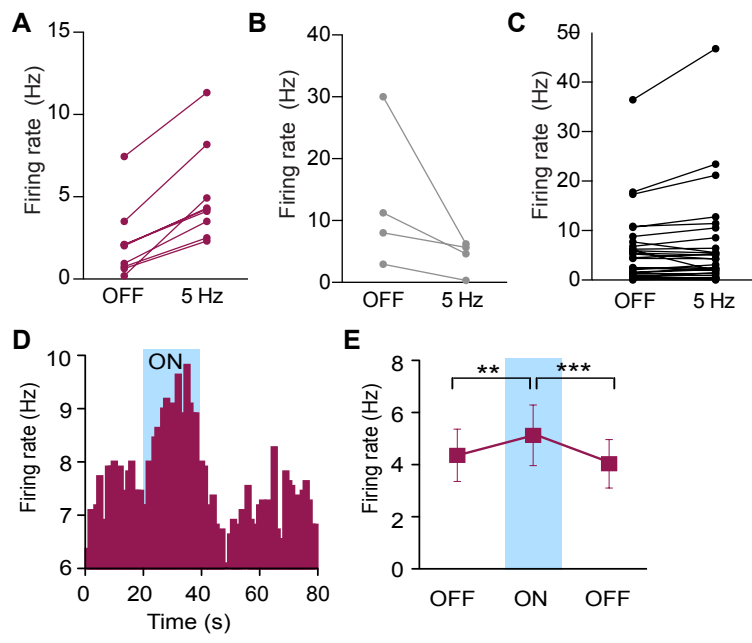

Supplement: supp [file elife_poa_e18247_Figure_3_figure_supplement_1.pdf › elife_poa_e18247_Figure_3_figure_supplement_1.pdf]

Figure 4 - supplement figure 1

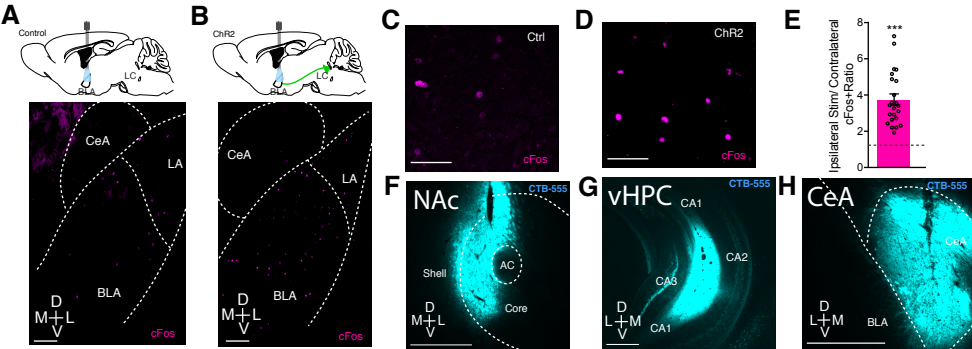

Supplement: supp [file elife_poa_e18247_Figure_4_figure_supplement_1.pdf › elife_poa_e18247_Figure_4_figure_supplement_1.pdf]

Figure 5 - supplement figure 1

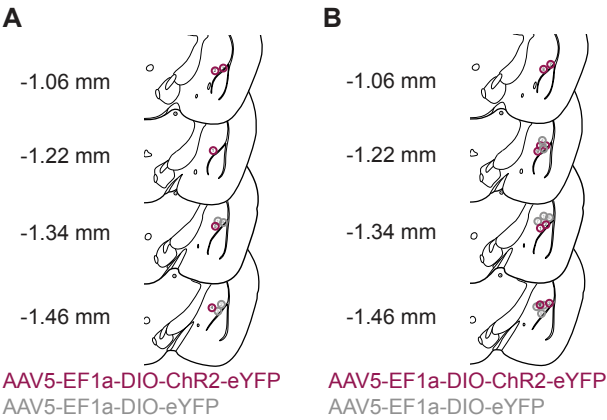

Supplement: supp [file elife_poa_e18247_Figure_5_figure_supplement_1.pdf › elife_poa_e18247_Figure_5_figure_supplement_1.pdf]

Figure 6 - supplement figure 1

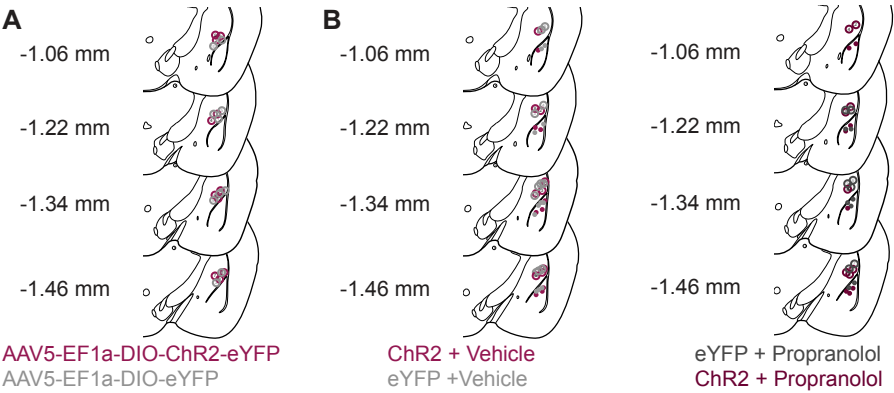

Supplement: supp [file elife_poa_e18247_Figure_6_figure_supplement_1.pdf › elife_poa_e18247_Figure_6_figure_supplement_1.pdf]
